# Supplementary material for: Cu(ii) complex-based fluorescence chemosensor for cyanide in aqueous media
Source: Royal Society of Chemistry journal article supplement (doi:10.1039/c5ra09511e), 2015-01-01
Supplement: c5ra09511e1.pdf [file c5ra09511e1.pdf]

## Supporting Information

# A Cu(II) Complex-based Fluorescence Chemosensor for Cyanide in Aqueous Media

*Dan Wang,<sup>†</sup> Jian-Quan Zheng,<sup>‡</sup> Xi Yan,<sup>†,\*</sup> Xiang-Jun Zheng<sup>†,\*</sup> and Lin-Pei Jin<sup>†</sup>*

<sup>†</sup> Beijing Key Laboratory of Energy Conversion and Storage Materials, College of Chemistry, Beijing Normal University, Beijing, 100875, People's Republic of China.

<sup>‡</sup> Beijing Key Laboratory for Bioactive Substances and Functional Foods, Beijing Union University, Beijing, 100191, People's Republic of China.

**Corresponding author:**

Tel.: +86-10-58805522; fax: +86-10-58802075.

E-mail address: [xjzheng@bnu.edu.cn](mailto:xjzheng@bnu.edu.cn) (X. -J. Zheng)

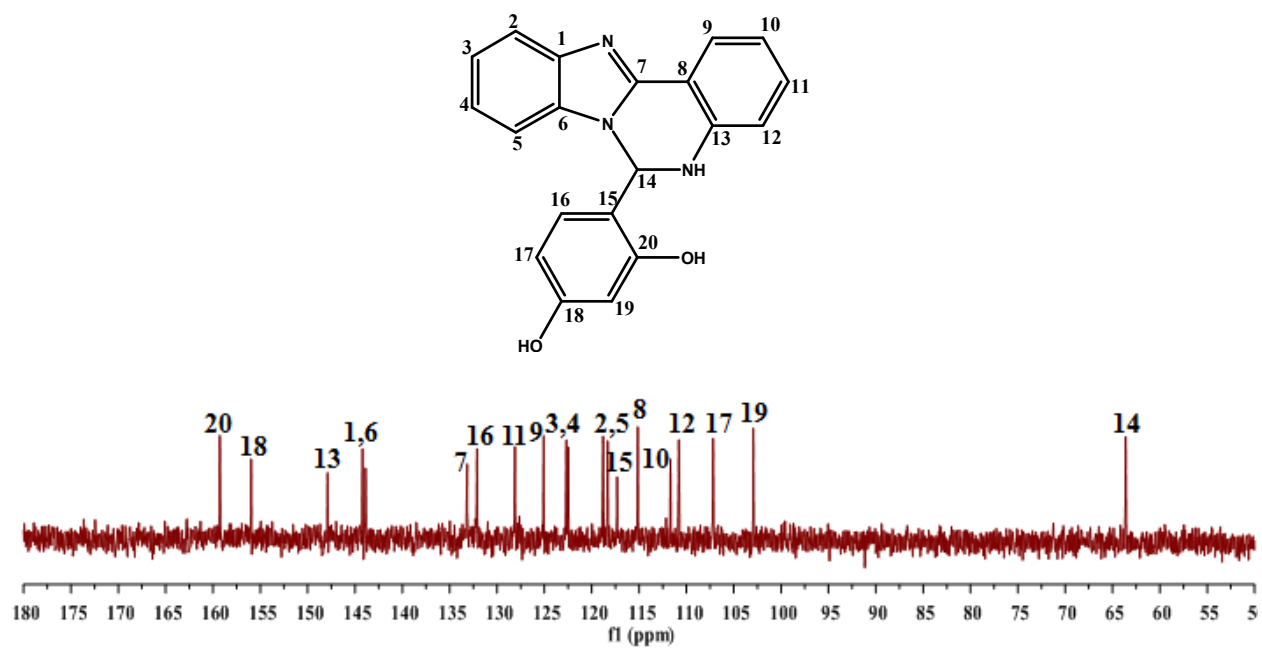

**Fig. S1**  $^{13}C$  NMR spectra of  $H_2L$  in  $DMSO-d_6$ .

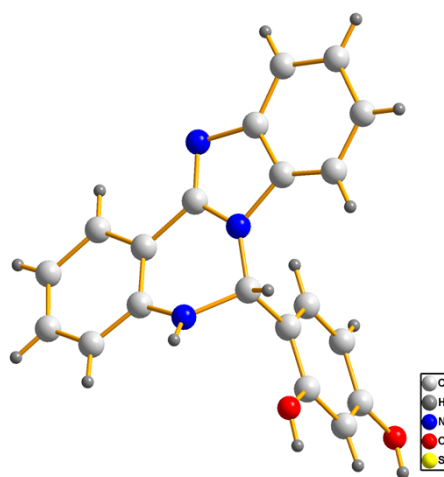

**Fig. S2** Molecular structures with an atom labeling schemes for the ligand  $H_2L$ .

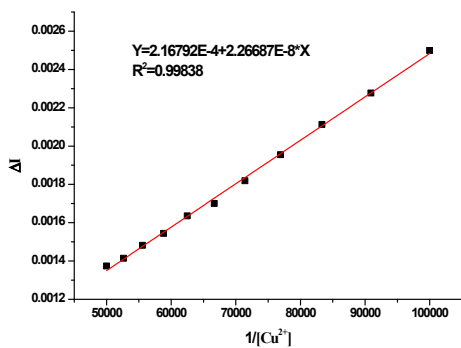

(a)

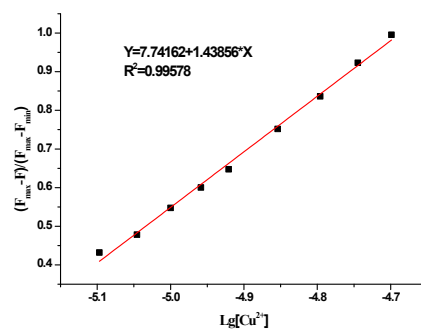

(b)

**Fig. S3** (a) Estimation of association constant by Benesi-Hildebrand (B-H) plot for 1:1 stoichiometry for the complexation between H<sub>2</sub>L and Cu<sup>2+</sup> in DMSO/H<sub>2</sub>O (1:1, v/v). (b) Normalized response of fluorescence signal at 432 nm to changing Cu<sup>2+</sup> concentrations.

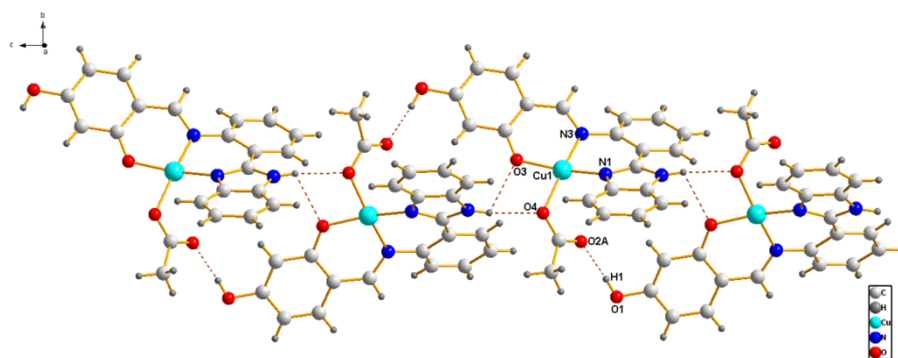

**Fig. S4** The intermolecular hydrogen bond in **1**.

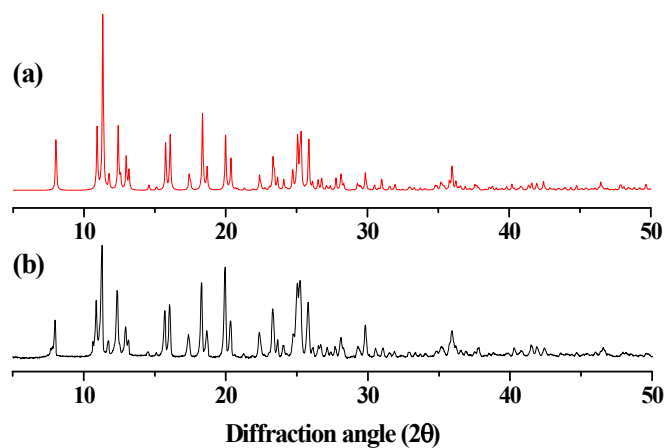

**Fig. S5** PXRD patterns of  $[\text{Cu}(\text{HL}^1)(\text{Ac})]$ : (a) simulated from 1 single-crystal X-ray diffraction data, (b) PXRD patterns of  $1'$  as-synthesized.

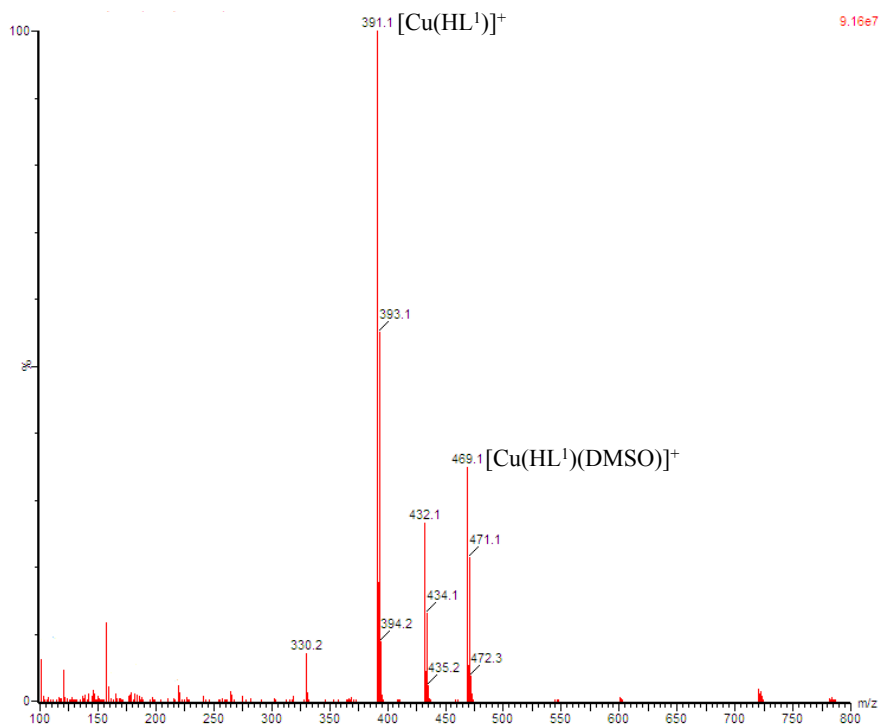

**Fig. S6** ESI-MS spectrum of  $\text{H}_2\text{L}$  ( $50 \mu\text{M}$ ) after treatment with an equal amount of  $\text{Cu}^{2+}$ .

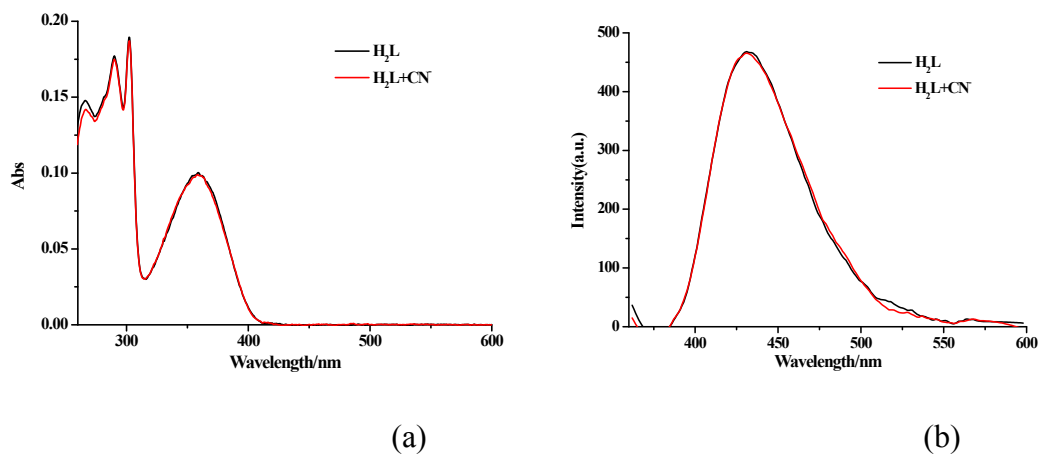

**Fig. S7** (a) UV-vis spectra of H<sub>2</sub>L (10 μM) in DMSO/H<sub>2</sub>O (1:1, v/v) with 1.0 equiv. of CN<sup>-</sup> ions.

(b) Fluorescence spectra of H<sub>2</sub>L (10 μM) in DMSO/H<sub>2</sub>O (1:1, v/v) with 1.0 equiv. of CN<sup>-</sup> ions.

$\lambda_{\text{ex}}=358$  nm.

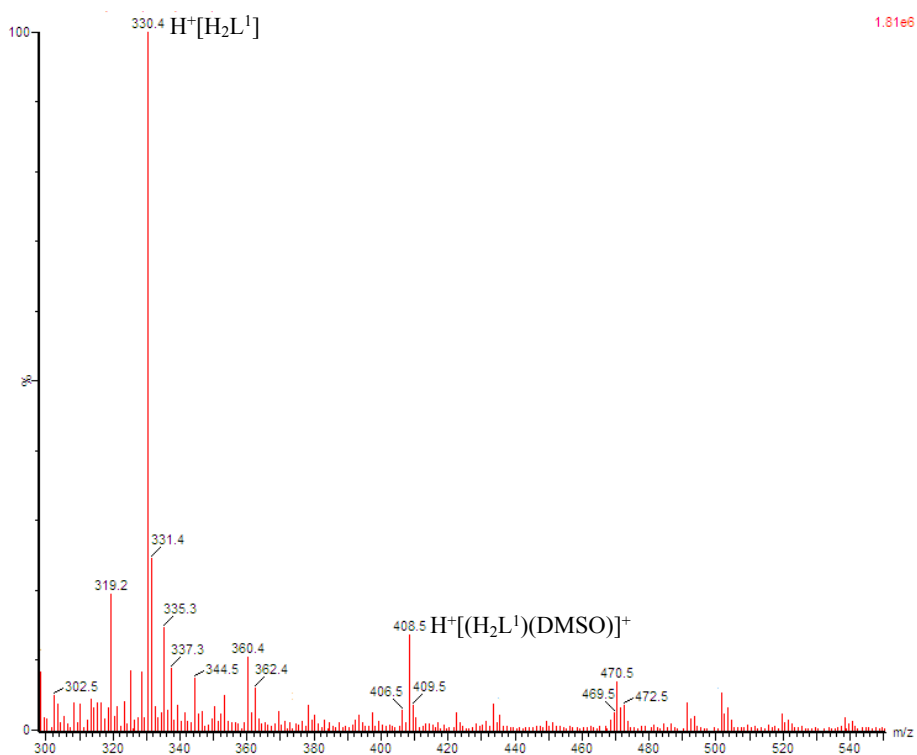

**Fig. S8** ESI-MS spectrum of **1** (10 μM) after treatment with 4.0 equiv. CN<sup>-</sup>.

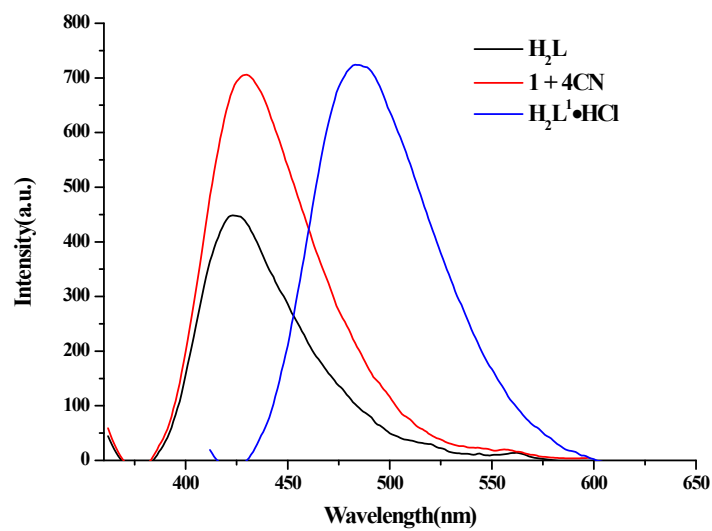

**Fig. S9** Fluorescence spectra of  $H_2L$  ( $\lambda_{ex}=358$  nm), **1** upon the addition of 4 equiv.  $CN^-$  ( $\lambda_{ex}=358$  nm) and  $H_2L^1 \cdot HCl$  ( $\lambda_{ex}=408$  nm) in DMSO/ $H_2O$  (1:1, v/v).

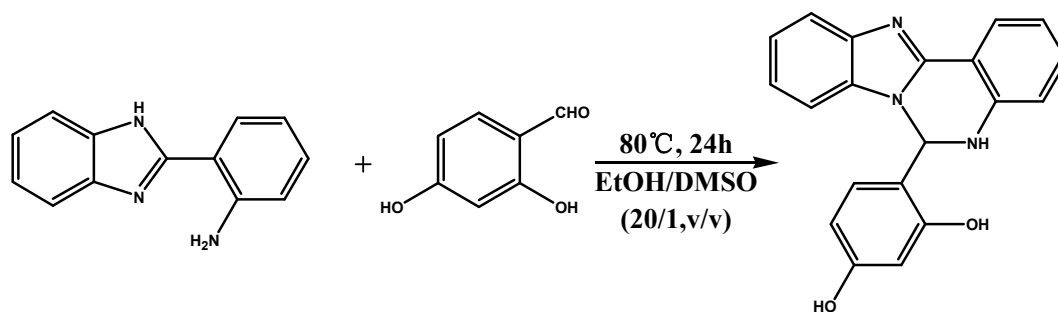

**Scheme S1** Reaction scheme for the synthesis of the ligand **H<sub>2</sub>L**.

**Table S1** Crystal data and structure refinement parameters of **H<sub>2</sub>L**.

| Compound                                 |  | <b>H<sub>2</sub>L</b>                                           |
|------------------------------------------|--|-----------------------------------------------------------------|
| Formula                                  |  | C <sub>22</sub> H <sub>21</sub> N <sub>3</sub> O <sub>3</sub> S |
| Fw                                       |  | 407.49                                                          |
| Crystal system                           |  | Orthorhombic                                                    |
| Space group                              |  | <i>Pbca</i>                                                     |
| <i>a</i> (Å)                             |  | 10.0302(11)                                                     |
| <i>b</i> (Å)                             |  | 16.5489(19)                                                     |
| <i>c</i> (Å)                             |  | 23.691(3)                                                       |
| $\alpha$ (°)                             |  | 90                                                              |
| $\beta$ (°)                              |  | 90                                                              |
| $\gamma$ (°)                             |  | 90                                                              |
| <i>V</i> (Å <sup>3</sup> )               |  | 3932.4(8)                                                       |
| <i>Z</i>                                 |  | 8                                                               |
| calculated density                       |  | 1.377                                                           |
| (g/cm <sup>3</sup> )                     |  |                                                                 |
| <i>F</i> (000)                           |  | 1712                                                            |
| Reflections                              |  | 25333 / 4522                                                    |
| collected/unique                         |  | [ <i>R</i> (int) = 0.0934]                                      |
| Goodness-of-fit on <i>F</i> <sup>2</sup> |  | 1.353                                                           |
| Final <i>R</i> indices                   |  | <i>R</i> <sub>1</sub> = 0.1262,                                 |
| [ <i>I</i> > 2σ( <i>I</i> )]             |  | <i>wR</i> <sub>2</sub> = 0.3705                                 |
| <i>R</i> indices (all data)              |  | <i>R</i> <sub>1</sub> = 0.2072,                                 |
|                                          |  | <i>wR</i> <sub>2</sub> = 0.4269                                 |

$$R_1 = \frac{\sum(|F_o| - |F_c|)}{\sum|F_o|}; wR_2 = \left\{ \frac{\sum[(w|F_o|^2 - |F_c|^2)]^2}{\sum w(F_o^2)} \right\}^{1/2}.$$

**Table S2** Selected Bond Distances (Å) and Angles (deg) for **H<sub>2</sub>L** and **1**.

| <b>H<sub>2</sub>L</b> |           |                   |           |
|-----------------------|-----------|-------------------|-----------|
| C(1)-C(2)             | 1.385(8)  | C(10)-C(11)       | 1.353(11) |
| C(1)-C(6)             | 1.385(7)  | C(11)-C(12)       | 1.431(11) |
| C(2)-O(2)             | 1.365(6)  | C(12)-C(13)       | 1.417(10) |
| C(2)-C(3)             | 1.398(7)  | C(13)-C(14)       | 1.512(9)  |
| C(3)-C(4)             | 1.355(7)  | C(14)-N(3)        | 1.274(8)  |
| C(4)-C(5)             | 1.385(7)  | C(14)-N(2)        | 1.323(7)  |
| C(5)-C(6)             | 1.412(7)  | C(15)-C(20)       | 1.357(10) |
| C(5)-C(7)             | 1.513(7)  | C(15)-C(16)       | 1.375(9)  |
| C(6)-O(1)             | 1.360(6)  | C(15)-N(3)        | 1.463(9)  |
| C(7)-N(2)             | 1.413(7)  | C(16)-C(17)       | 1.368(12) |
| C(7)-N(1)             | 1.500(8)  | C(17)-C(18)       | 1.458(12) |
| C(8)-C(9)             | 1.348(10) | C(18)-C(19)       | 1.358(11) |
| C(8)-C(13)            | 1.373(9)  | C(19)-C(20)       | 1.317(10) |
| C(8)-N(1)             | 1.406(8)  | C(20)-N(2)        | 1.463(8)  |
| C(9)-C(10)            | 1.360(11) |                   |           |
| C(2)-C(1)-C(6)        | 119.5(5)  | C(8)-C(13)-C(12)  | 120.3(6)  |
| O(2)-C(2)-C(1)        | 122.2(5)  | C(8)-C(13)-C(14)  | 119.6(6)  |
| O(2)-C(2)-C(3)        | 118.0(5)  | C(12)-C(13)-C(14) | 120.0(6)  |
| C(1)-C(2)-C(3)        | 119.8(5)  | N(3)-C(14)-N(2)   | 118.9(7)  |
| C(4)-C(3)-C(2)        | 120.0(5)  | N(3)-C(14)-C(13)  | 127.4(6)  |
| C(3)-C(4)-C(5)        | 122.1(5)  | N(2)-C(14)-C(13)  | 113.6(6)  |
| C(4)-C(5)-C(6)        | 117.7(5)  | C(20)-C(15)-C(16) | 120.3(7)  |
| C(4)-C(5)-C(7)        | 124.9(4)  | C(20)-C(15)-N(3)  | 113.6(6)  |
| C(6)-C(5)-C(7)        | 117.5(5)  | C(16)-C(15)-N(3)  | 126.1(7)  |
| O(1)-C(6)-C(1)        | 123.3(4)  | C(17)-C(16)-C(15) | 117.9(7)  |
| O(1)-C(6)-C(5)        | 115.8(4)  | C(16)-C(17)-C(18) | 119.4(6)  |
| C(1)-C(6)-C(5)        | 120.8(5)  | C(19)-C(18)-C(17) | 119.6(7)  |
| N(2)-C(7)-N(1)        | 104.1(5)  | C(20)-C(19)-C(18) | 118.1(7)  |



|                   |          |                   |          |
|-------------------|----------|-------------------|----------|
| N(2)-C(7)-C(5)    | 113.1(5) | C(19)-C(20)-C(15) | 124.6(6) |
| N(1)-C(7)-C(5)    | 112.7(5) | C(19)-C(20)-N(2)  | 133.9(7) |
| C(9)-C(8)-C(13)   | 120.7(6) | C(15)-C(20)-N(2)  | 101.5(6) |
| C(9)-C(8)-N(1)    | 121.6(7) | C(8)-N(1)-C(7)    | 119.7(5) |
| C(13)-C(8)-N(1)   | 117.3(6) | C(14)-N(2)-C(7)   | 130.4(6) |
| C(8)-C(9)-C(10)   | 119.5(7) | C(14)-N(2)-C(20)  | 106.0(5) |
| C(11)-C(10)-C(9)  | 124.1(8) | C(7)-N(2)-C(20)   | 123.3(6) |
| C(10)-C(11)-C(12) | 117.4(7) | C(14)-N(3)-C(15)  | 99.9(6)  |
| C(13)-C(12)-C(11) | 118.0(7) |                   |          |

---

**1**

---

|                 |            |                  |            |
|-----------------|------------|------------------|------------|
| Cu(1)-N(1)      | 1.953(2)   | Cu(1)-O(3)       | 1.8839(19) |
| Cu(1)-N(3)      | 1.9574(19) | Cu(1)-O(4)       | 1.9851(19) |
| O(3)-Cu(1)-N(1) | 162.18(9)  | C(7)-N(1)-Cu(1)  | 124.68(16) |
| O(3)-Cu(1)-N(3) | 94.48(8)   | C(6)-N(1)-Cu(1)  | 129.00(16) |
| N(1)-Cu(1)-N(3) | 91.03(8)   | C(14)-N(3)-Cu(1) | 120.41(15) |
| O(3)-Cu(1)-O(4) | 84.31(8)   | C(13)-N(3)-Cu(1) | 122.57(15) |
| N(1)-Cu(1)-O(4) | 94.11(8)   | C(20)-O(3)-Cu(1) | 126.28(15) |
| N(3)-Cu(1)-O(4) | 166.64(8)  | C(2A)-O(4)-Cu(1) | 114.97(15) |

---
